# Supplementary material for: DYPTOP: a cost-efficient TOPMODEL implementation to simulate sub-grid spatio-temporal dynamics of global wetlands and peatlands
Source: Copernicus journal article supplement (doi:10.5194/gmd-7-3089-2014), 2014-12-18
Supplement: Supplementary file 1 [file gmd-7-3089-2014-supplement.zip]

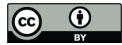

## *Supplement of*

# **DYPTOP: a cost-efficient TOPMODEL implementation to simulate sub-grid spatio-temporal dynamics of global wetlands and peatlands**

**B. D. Stocker et al.**

*Correspondence to:* B. D. Stocker (b.stocker@imperial.ac.uk)

- gmd-7-3089-2014-supplement-cover-letter.pdf
- DYPTOP\_SI
  - .DS\_Store
  - DYPTOP\_input
    - \* params\_dyptop\_M8\_C12\_filled\_1x1deg.nc
  - DYPTOP\_src
    - \* .DS\_Store
    - \* Makefile
    - \* README
    - \* fflooded.F
    - \* getdyptoppar.F
    - \* globalvars.mod.F
    - \* gridcellfraction.F
    - \* main.F
    - \* params\_core.mod.F
    - \* params\_dyptop.mod.F
    - \* screenout.txt
- \_\_MACOSX
  - .\_DYPTOP\_SI
  - DYPTOP\_SI
    - \* .\_DS\_Store
    - \* .\_DYPTOP\_input
    - \* .\_DYPTOP\_src
    - \* DYPTOP\_input
    - \* DYPTOP\_src
